# Supplementary material for: A multifunctional strategy of two-dimensional WS2modified absorbers for efficient planar perovskite solar cells
Source: Royal Society of Chemistry journal article supplement (doi:10.1039/d2nj05350k), 2022-12-22
Supplement: d2nj05350k1.pdf [file d2nj05350k1.pdf]

## **Multifunctional strategy of two-dimensional WS<sub>2</sub> modified absorbers for efficient planar perovskite solar cells**

Qinghua Sun,<sup>a</sup> Wanting Hu,<sup>a</sup> Miao Yu,<sup>a</sup> Fengyou Wang,<sup>ab</sup> Xiaoyan Liu,<sup>ab</sup> Lihua Yang,<sup>ab</sup>  
Huilian Liu,<sup>\*ab</sup> Lin Fan<sup>\*\*ab</sup> and Lili Yang<sup>\*\*\*ab</sup>

<sup>a</sup> *Key Laboratory of Functional Materials Physics and Chemistry (Ministry of Education), College of Physics, Jilin Normal University, Changchun 130103, China*

<sup>b</sup> *National Demonstration Center for Experimental Physics Education, Jilin Normal University, Siping 136000, China*

\* Correspondence: [lhl541@126.com](mailto:lhl541@126.com) (H. Liu), [fanlin@jlnu.edu.cn](mailto:fanlin@jlnu.edu.cn) (L. Fan), [llyang1980@126.com](mailto:llyang1980@126.com) (L. Yang)

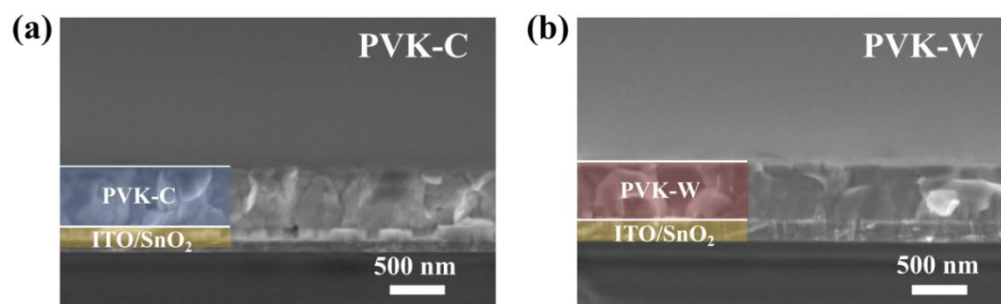

**Figure S1.** Cross-sectional SEM images of different absorbers: (a) PVK-C and (b) PVK-W.

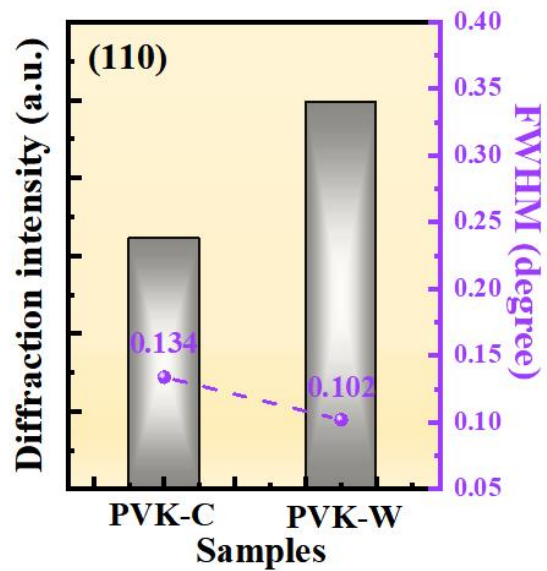

**Figure S2.** FWHM and diffraction intensity of PVK-C and PVK-W films.

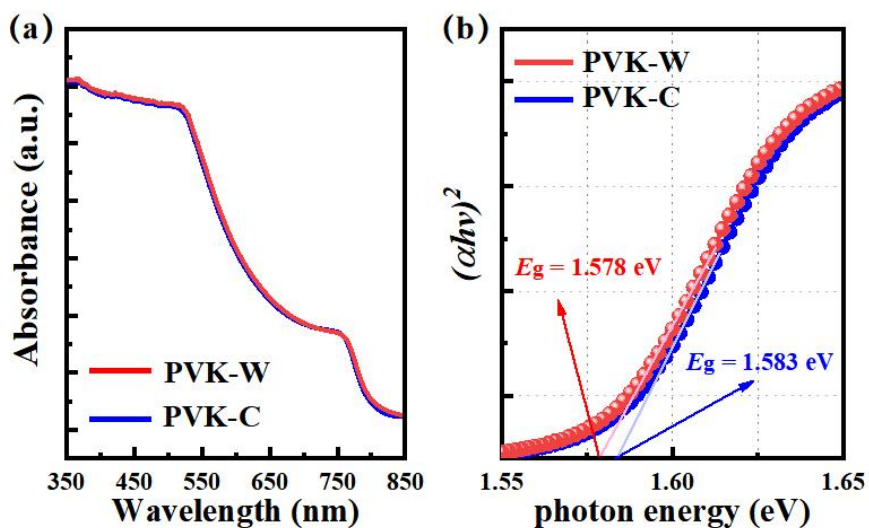

**Figure S3.** (a) UV-vis absorption spectra and (b) Tauc plots of perovskite films with and without WS<sub>2</sub> NSs. The  $E_g$  of the samples with and without WS<sub>2</sub> were calculated to be 1.578 and 1.583 eV, respectively, using the formula  $\alpha h\nu = A (h\nu - E_g)^n$ , where  $\alpha$  is the absorption coefficient,  $h\nu$  is photon energy,  $A$  is a constant, and  $n$  varies according to allowed or forbidden direct and indirect transitions. The value  $n = 1/2$  is employed in this case since the perovskite is regarded as a direct band-gap semiconductor.

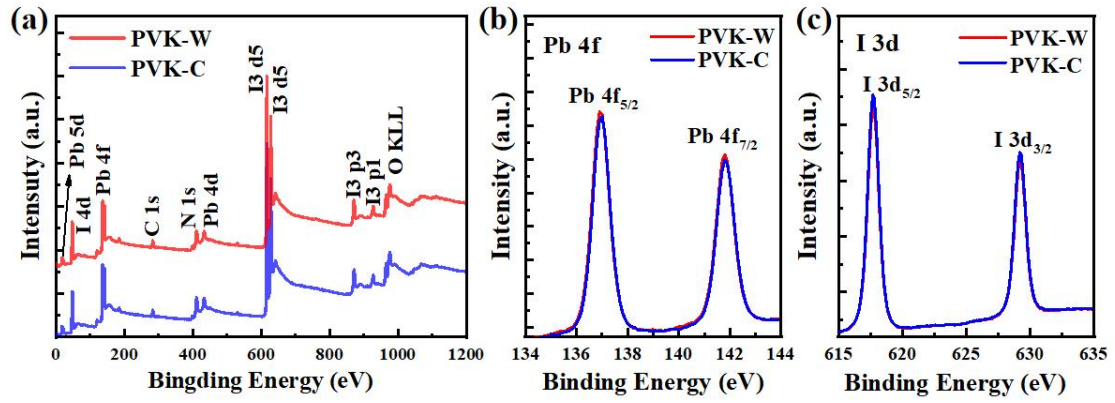

**Figure S4.** (a) XPS spectra of PVK-C and PVK-W films. High-resolution XPS spectra of the corresponding samples: (b) Pb 4f and (c) I 3d.

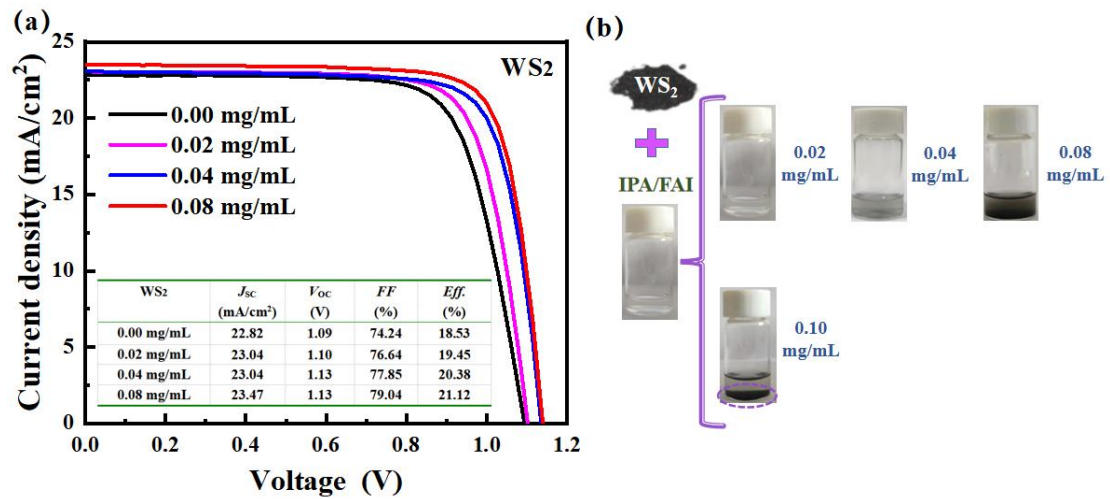

**Figure S5.** (a)  $J$ - $V$  curves of planar PSCs fabricated with the WS<sub>2</sub> concentrations of 0.00 mg/mL, 0.02 mg/mL, 0.04 mg/mL, and 0.08 mg/mL, respectively. (b) Photographs of dispersions fabricated using WS<sub>2</sub> of 0.00, 0.02, 0.04, 0.08, and 0.10 mg/mL.

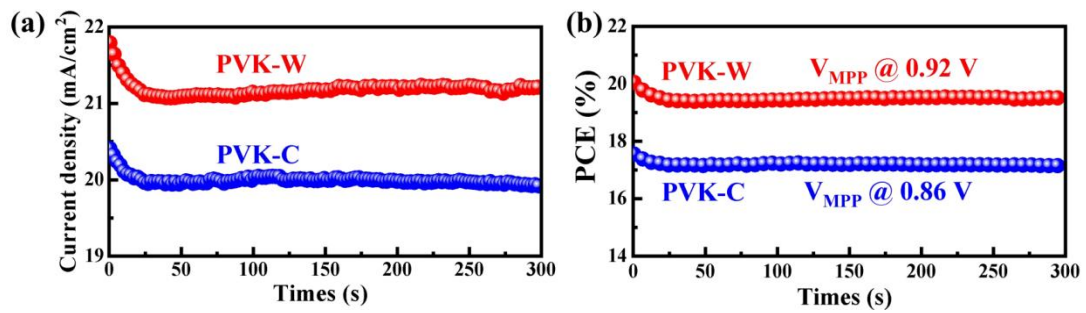

**Figure S6.** (a)-(b) Stable current densities and PCEs measured under constant bias of 0.86 V (PVK-C device) and 0.92 V (PVK-W device).

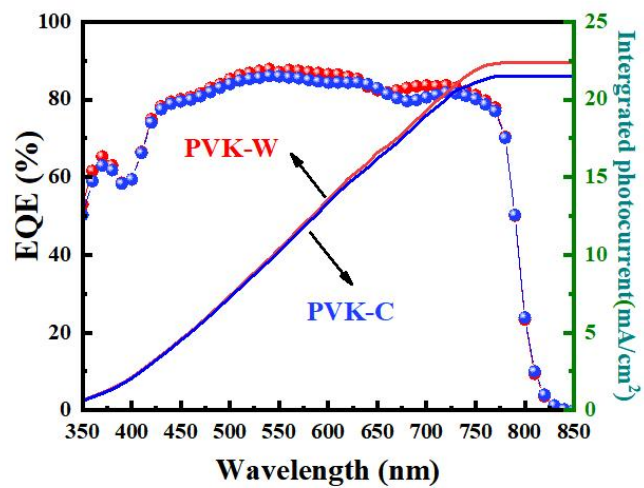

**Figure S7.** EQE spectra of the best-performing planar devices based on PVK-C and PVK-W devices.



**Table S1**

Dynamic parameters from TRPL curves.

| <b>Samples</b> | $A_1$ | $\tau_1$ (ns) | $A_2$ | $\tau_2$ (ns) |
|----------------|-------|---------------|-------|---------------|
| <b>PVK-C</b>   | 4104  | 8.3           | 2038  | 33.9          |
| <b>PVK-W</b>   | 1005  | 2.8           | 490   | 22.8          |

**Table S2**

Fitting parameters from EIS.

| <b>Samples</b> | <b><math>R_s</math></b><br><b>(<math>\Omega</math>)</b> | <b><math>R_{tr}</math></b><br><b>(<math>\Omega</math>)</b> | <b><math>R_{rec}</math></b><br><b>(<math>\Omega</math>)</b> | <b><math>C_{tr}</math></b><br><b>(F)</b> | <b><math>C_{rec}</math></b><br><b>(F)</b> |
|----------------|---------------------------------------------------------|------------------------------------------------------------|-------------------------------------------------------------|------------------------------------------|-------------------------------------------|
| <b>PVK-C</b>   | 31.20                                                   | 52.35                                                      | 185.8                                                       | $1.05 \times 10^{-8}$                    | $6.7 \times 10^{-9}$                      |
| <b>PVK-W</b>   | 17.46                                                   | 32.26                                                      | 327.5                                                       | $1.04 \times 10^{-8}$                    | $8.2 \times 10^{-9}$                      |

**Table S3**

Photovoltaic parameters of PVK-W PSCs. The  $J-V$  curves were measured in R-S under the AM 1.5G illumination. Average data were calculated from 12 devices for each condition.

| PVK-W PSCs     | $J_{sc}$<br>(mA/cm <sup>2</sup> ) | $V_{oc}$<br>(V)    | $FF$<br>(%)         | $Eff.$<br>(%)       |
|----------------|-----------------------------------|--------------------|---------------------|---------------------|
| <b>1</b>       | 22.82                             | 1.10               | 78.86               | 19.89               |
| <b>2</b>       | 23.52                             | 1.12               | 77.03               | 20.43               |
| <b>3</b>       | 23.25                             | 1.10               | 75.25               | 19.36               |
| <b>4</b>       | 23.15                             | 1.11               | 78.63               | 20.24               |
| <b>5</b>       | 23.35                             | 1.11               | 78.12               | 20.32               |
| <b>6</b>       | 23.65                             | 1.12               | 78.92               | 21.03               |
| <b>7</b>       | 23.11                             | 1.10               | 77.09               | 19.64               |
| <b>8</b>       | 23.94                             | 1.14               | 75.52               | 20.74               |
| <b>9</b>       | 24.12                             | 1.13               | 76.58               | 20.96               |
| <b>10</b>      | 24.23                             | 1.13               | 76.31               | 20.87               |
| <b>11</b>      | 23.71                             | 1.09               | 75.96               | 19.80               |
| <b>12</b>      | 23.59                             | 1.10               | 76.66               | 20.03               |
| <b>Average</b> | <b>23.53 ± 0.41</b>               | <b>1.11 ± 0.02</b> | <b>77.07 ± 1.24</b> | <b>20.27 ± 0.53</b> |

**Table S4**

Photovoltaic parameters of PVK-C PSCs. The  $J-V$  curves were measured in R-S under the AM 1.5G illumination. Average data were calculated from 12 devices for each condition.

| <b>PVK-C PSCs</b> | <b><math>J_{sc}</math><br/>(mA/cm<sup>2</sup>)</b> | <b><math>V_{oc}</math><br/>(V)</b> | <b><math>FF</math><br/>(%)</b> | <b><math>Eff.</math><br/>(%)</b> |
|-------------------|----------------------------------------------------|------------------------------------|--------------------------------|----------------------------------|
| <b>1</b>          | 22.31                                              | 1.11                               | 73.72                          | 18.35                            |
| <b>2</b>          | 22.63                                              | 1.13                               | 73.22                          | 18.73                            |
| <b>3</b>          | 21.42                                              | 1.09                               | 73.10                          | 17.03                            |
| <b>4</b>          | 22.80                                              | 1.12                               | 73.26                          | 18.76                            |
| <b>5</b>          | 21.46                                              | 1.10                               | 70.98                          | 18.24                            |
| <b>6</b>          | 22.27                                              | 1.13                               | 74.41                          | 17.63                            |
| <b>7</b>          | 23.01                                              | 1.13                               | 74.87                          | 19.49                            |
| <b>8</b>          | 22.93                                              | 1.13                               | 74.74                          | 19.38                            |
| <b>9</b>          | 22.83                                              | 1.12                               | 73.40                          | 18.90                            |
| <b>10</b>         | 22.52                                              | 1.10                               | 73.78                          | 18.30                            |
| <b>11</b>         | 23.27                                              | 1.13                               | 74.69                          | 19.75                            |
| <b>12</b>         | 22.75                                              | 1.13                               | 73.88                          | 19.02                            |
| <b>Average</b>    | <b>22.51±0.56</b>                                  | <b>1.11±0.02</b>                   | <b>73.67±1.01</b>              | <b>18.63±0.75</b>                |
